# Supplementary material for: Efficacy of checkpoint inhibition after CAR-T failure in aggressive B-cell lymphomas: outcomes from 15 US institutions
Source: PubMed Central journal article supplement — Blood Adv. 2023 Apr 11;7(16):4528–38. doi: 10.1182/bloodadvances.2023010016 (PMC10425681; doi:10.1182/bloodadvances.2023010016), 2023-04-11

**Supplementary Table 1.** Univariable analyses of clinical features with overall and complete response rates.

| Characteristics                                   | ORR          |                   |              | CR            |            |      |
|---------------------------------------------------|--------------|-------------------|--------------|---------------|------------|------|
|                                                   | OR           | 95% CI            | P            | OR            | 95% CI     | P    |
| Age in deciles                                    | 0.72         | 0.51-1.01         | 0.060        | 0.91          | 0.60-1.40  | 0.65 |
| Male sex                                          | 1.02         | 0.35-3.24         | 0.97         | 1.21          | 0.31-5.97  | 0.79 |
| <b>Histology</b>                                  |              |                   |              |               |            |      |
| DLBCL                                             | —            | —                 | Ref          | ***           | ***        | 0.21 |
| HGBL                                              | 2.00         | 0.26-10.96        | 0.45         |               |            |      |
| FL                                                | 7.00         | 0.25-193.94       | 0.19         |               |            |      |
| PMBCL                                             | <b>11.67</b> | <b>2.31-70.59</b> | <b>0.004</b> |               |            |      |
| Transformed lymphomas                             | 1.00         | 0.14-4.94         | 1            |               |            |      |
| THRLBCL                                           | 3.50         | 0.42-22.62        | 0.20         |               |            |      |
| Non-GCB cell of origin                            | 1.75         | 0.47-6.75         | 0.40         | 1.89          | 0.38-10.33 | 0.43 |
| Double expressor lymphoma                         | ***          | ***               | 0.57         | not performed |            |      |
| Double hit lymphoma                               | ***          | ***               | 0.32         | not performed |            |      |
| History of primary refractory disease             | 1.22         | 0.43-3.53         | 0.71         | 0.59          | 0.14-2.21  | 0.44 |
| Previous transplant                               | 1.37         | 0.43-4.07         | 0.58         | 1.11          | 0.22-4.40  | 0.89 |
| Receipt of CPI prior to CAR-T                     | 0.76         | 0.04-5.17         | 0.81         | 1.62          | 0.08-11.68 | 0.67 |
| Receipt of BTK inhibitors prior to CAR-T          | 0.54         | 0.03-3.32         | 0.57         | ***           | ***        | 0.59 |
| Receipt of immunomodulatory agents prior to CAR-T | ***          | ***               | <b>0.035</b> | ***           | ***        | 0.20 |
| Receipt of bridging therapy prior to CAR-T        | 0.62         | 0.21-1.88         | 0.38         | 1.02          | 0.26-5.03  | 0.98 |
| <b>CAR-T product administered</b>                 |              |                   |              |               |            |      |
| axicabtagene ciloleucel                           | —            | —                 | Ref          | ***           | ***        | 0.20 |
| lisocabtagene maraleucel                          | 2.60         | 0.66-9.84         | 0.16         |               |            |      |
| tisagenlecleucel                                  | 1.50         | 0.40-5.34         | 0.53         |               |            |      |
| other                                             | 5.71         | 0.21-156.52       | 0.24         |               |            |      |
| Grade of CRS during CAR-T                         | ***          | ***               | 0.32         | ***           | ***        | 0.66 |
| Grade of ICANS during CAR-T                       | ***          | ***               | 0.31         | ***           | ***        | 0.68 |
| <b>Relapse type</b>                               |              |                   |              |               |            |      |
| Early relapse                                     | —            | —                 | Ref          | —             | —          | Ref  |
| Late relapse                                      | 3.23         | 0.85-11.51        | 0.072        | 3.40          | 0.64-15.27 | 0.12 |
| <b>Stage at relapse after CAR-T</b>               |              |                   |              |               |            |      |
| I                                                 | —            | —                 | Ref          | —             | —          | Ref  |
| II                                                | 1.23         | 0.13-27.84        | 0.87         | 0.53          | 0.04-13.19 | 0.64 |
| III                                               | 0.40         | 0.01-11.80        | 0.55         | 0.40          | 0.01-11.80 | 0.55 |
| IV                                                | 1.00         | 0.13-20.60        | 1            | 0.40          | 0.05-8.62  | 0.45 |
| <b>Extranodal disease at relapse after CAR-T</b>  |              |                   |              |               |            |      |
| No                                                | —            | —                 | Ref          | —             | —          | Ref  |
| Yes, only 1 site                                  | 1.52         | 0.35-7.94         | 0.59         | 4.04          | 0.59-80.57 | 0.22 |
| Yes, > 1 site                                     | 1.88         | 0.47-9.42         | 0.40         | 1.97          | 0.23-41.27 | 0.57 |
| Bulky disease at relapse after CAR-T              | 0.79         | 0.20-2.57         | 0.72         | 0.75          | 0.11-3.40  | 0.73 |
| CNS involvement at time of relapse after CAR-T    | 0.65         | 0.03-4.17         | 0.70         | ***           | ***        | 1    |
| CPI type received                                 | ***          | ***               | 0.94         | ***           | ***        | 1    |
| Concurrent therapeutics with CPI                  | 1.21         | 0.38-3.63         | 0.73         | 0.91          | 0.18-3.57  | 0.80 |
| Grade ≥3 AEs due to CPI                           | 0.98         | 0.21-3.59         | 0.98         | 0.52          | 0.03-3.09  | 0.54 |

\*\*\* = Fisher's exact test performed due to variables with zero individuals in at least one strata.

**Supplementary Figure 1.** Progression-free survival (PFS) in a combined cohort of patients with DLBCL and HGBL by type of CAR-T product received.

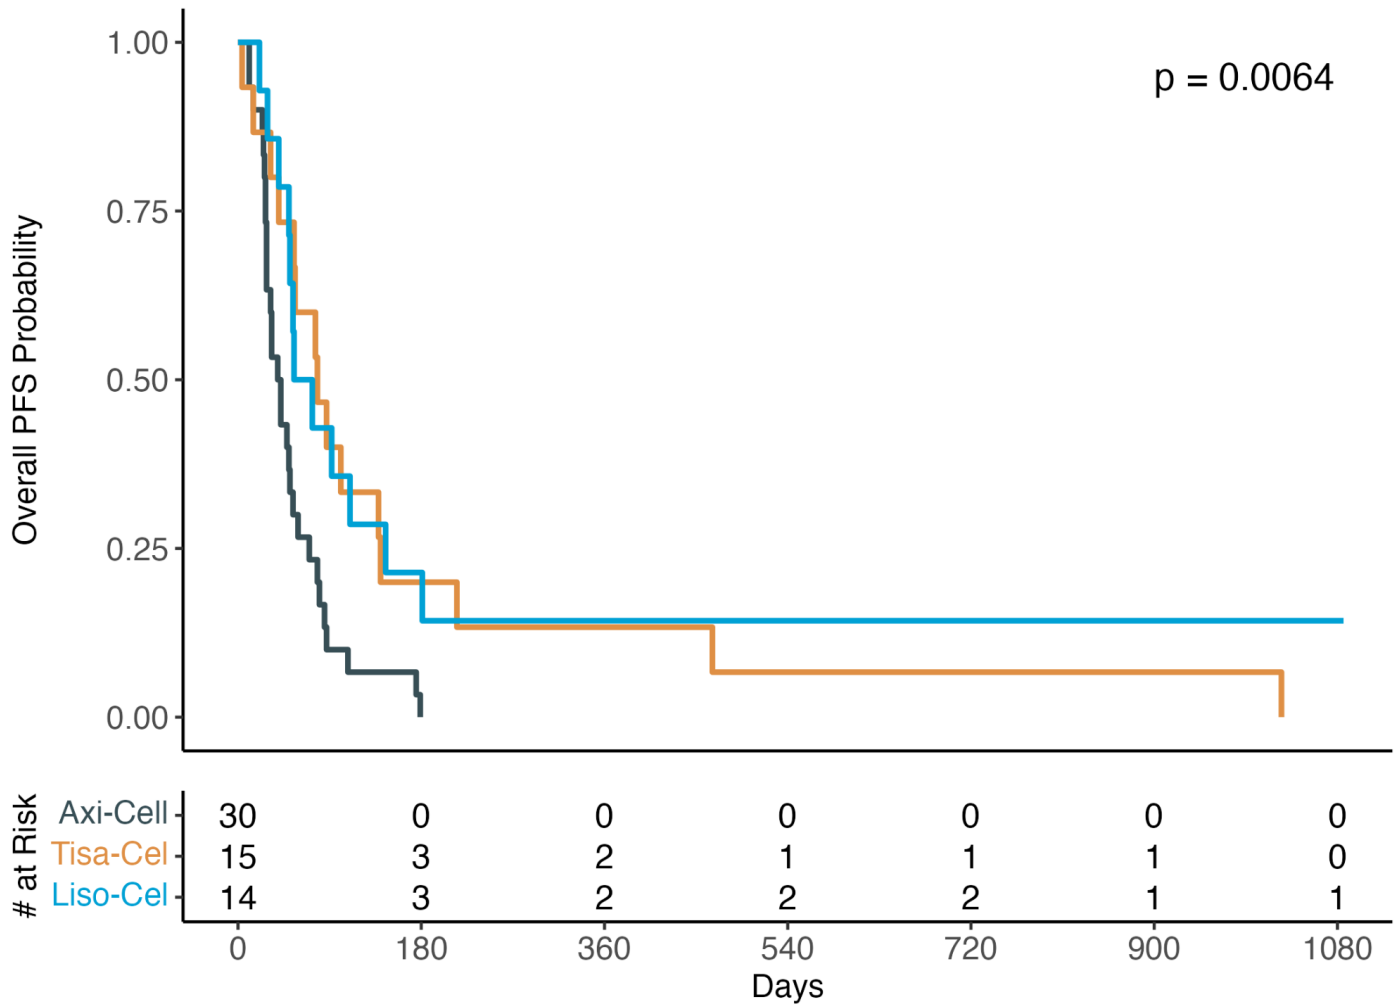

Supplement: BLOODA_ADV-2023-010016-mmc1.pdf [file BLOODA_ADV-2023-010016-mmc1.pdf]
